# Supplementary material for: Study on lattice dynamics and thermal conductivity of fluorite AF2 (A = Ca, Sr, Ba) based on first principles calculations
Source: Royal Society of Chemistry journal article supplement (doi:10.1039/d4cp00201f), 2024-01-01
Supplement: d4cp00201f1.pdf [file d4cp00201f1.pdf]

# Supplementary material: Study on lattice dynamics and thermal conductivity of fluorite $\text{AF}_2$ ( $\text{A} = \text{Ca}, \text{Sr}, \text{Ba}$ ) based on first principles

Peipei Liu,<sup>1</sup> Yinchang Zhao,<sup>1,\*</sup> Xichang Wang,<sup>1</sup> Jun Ni,<sup>2,3</sup> and Zhenhong Dai<sup>1,†</sup>

<sup>1</sup>*Department of Physics, Yantai University,  
Yantai 264005, People's Republic of China*

<sup>2</sup>*State Key Laboratory of Low-Dimensional Quantum Physics,  
Department of Physics, Tsinghua University,  
Beijing 100084, People's Republic of China*

<sup>3</sup>*Frontier Science Center for Quantum Information,  
Beijing 100084, People's Republic of China*

(Dated: March 5, 2024)

PACS numbers: 65.40.-b, 66.70.-f, 63.20.-e, 72.20.-i

Keywords: fluorite structure, first-principles calculation, thermal transport properties, lattice thermal conductivity

### A. Supplementary Figures.

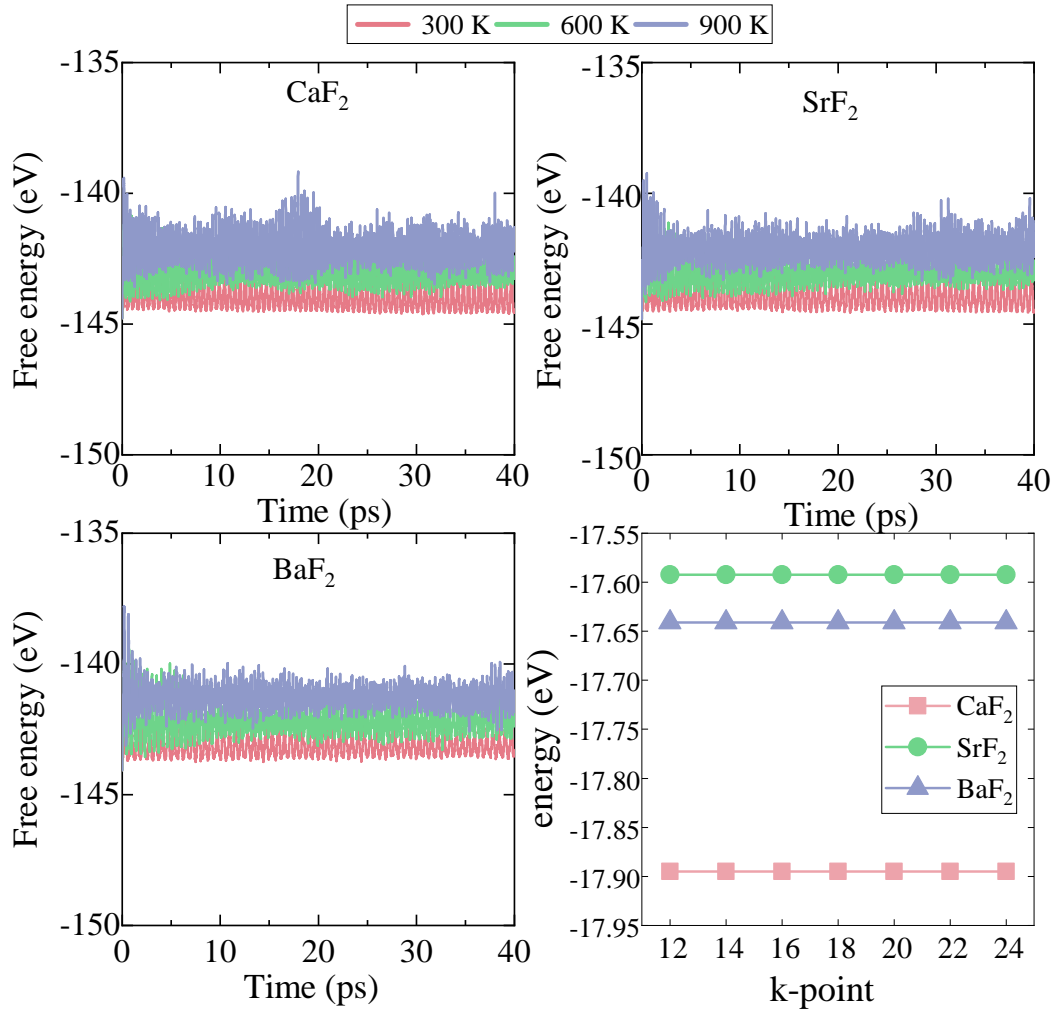

**Fig. S1.** (Color online). The free energy as the function of time for AF<sub>2</sub> (A = Ca, Sr, Ba) at 300 K, 600 K and 900 K.

S1 are the results of AIMD simulations for the CaF<sub>2</sub>, SrF<sub>2</sub> and BaF<sub>2</sub>. It is no significant changes in free energy for these three materials, which exhibit these three materials are stable.

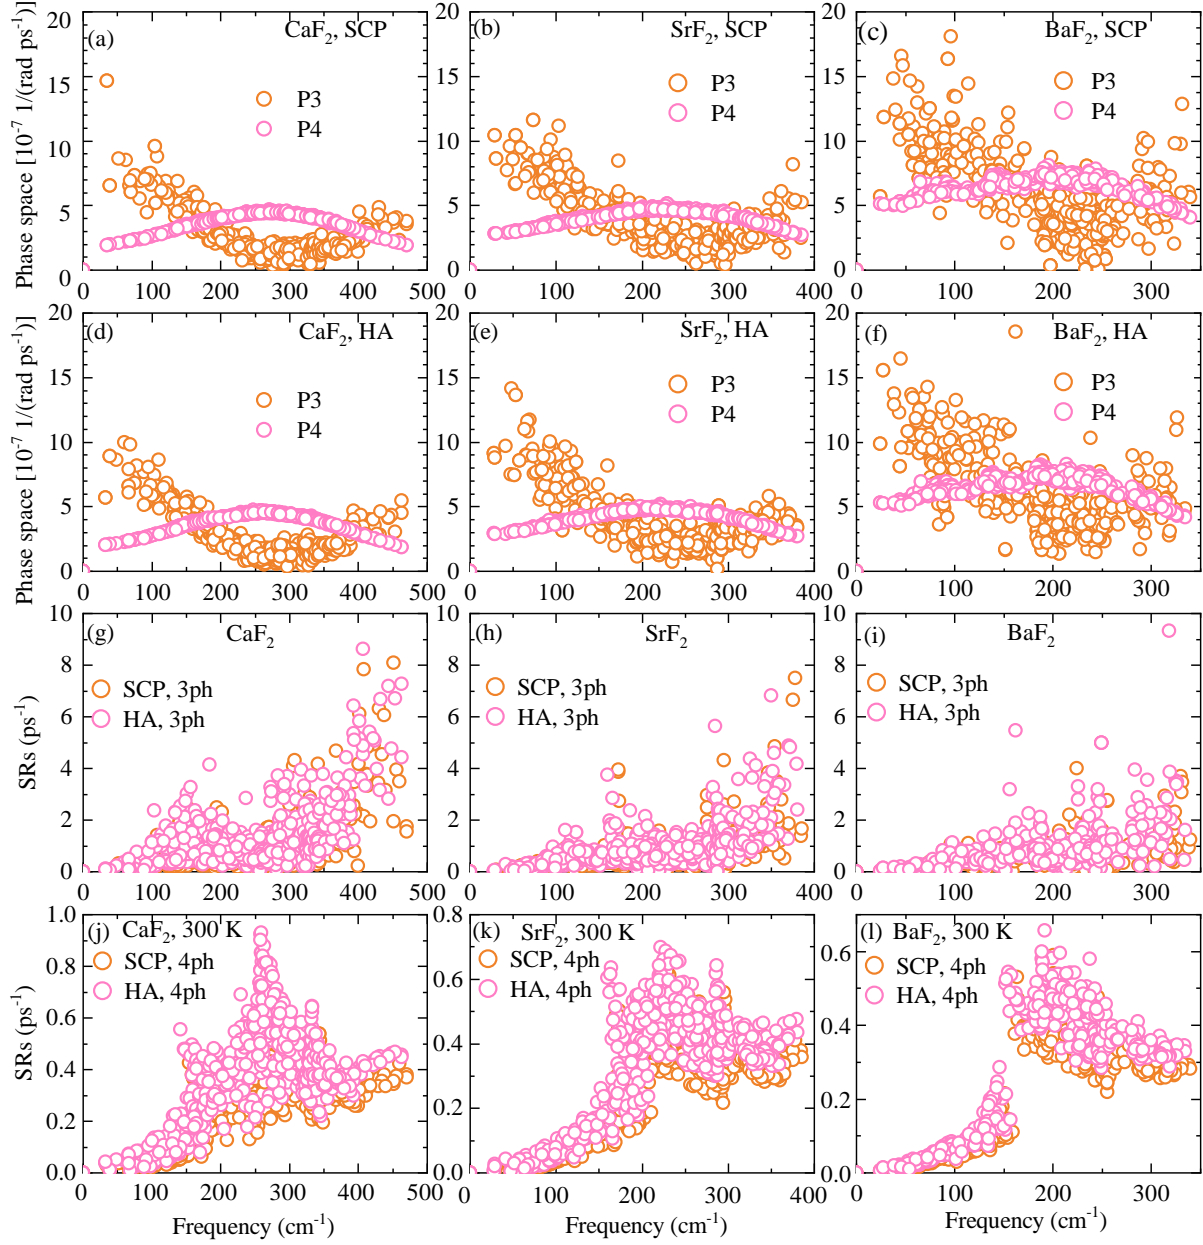

**Fig. S2.** (Color online). The scattering phase space of (a) CaF<sub>2</sub>, (b) SrF<sub>2</sub> and (c) BaF<sub>2</sub> at 300 K was calculated by SCP approximation. In addition, we calculated the 3ph SRs and 4ph SRs of CaF<sub>2</sub>, SrF<sub>2</sub> and BaF<sub>2</sub> at 300 K using SCP approximation and HA approximation, respectively.

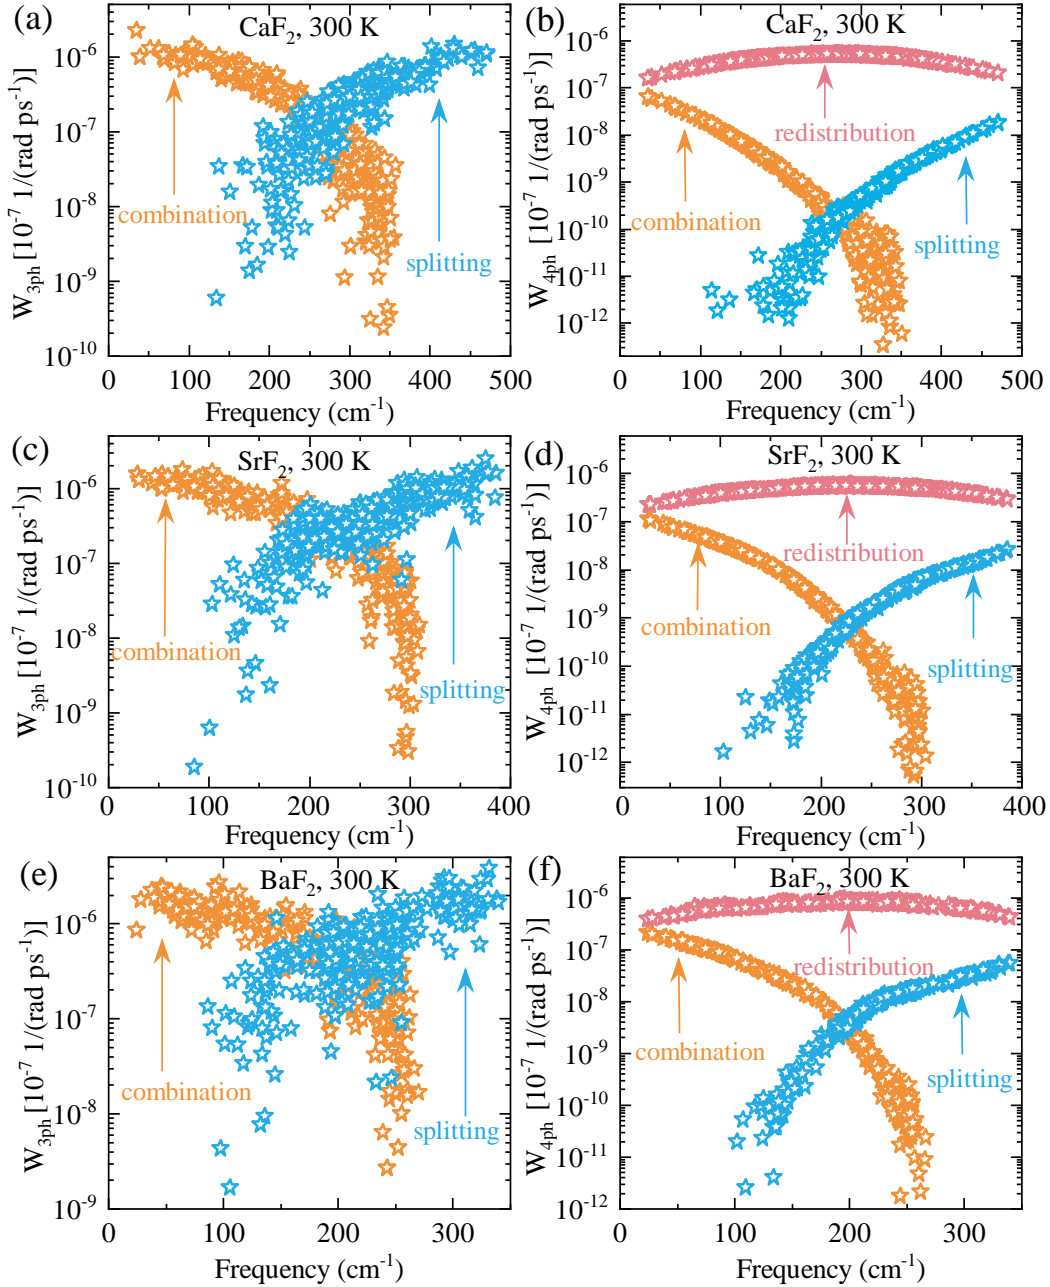

**Fig. S3.** (Color online). Decomposed 3ph scattering phase spaces into the splitting ( $\lambda \rightarrow \lambda' + \lambda''$ ) and combination ( $\lambda + \lambda' \rightarrow \lambda''$ ) processes at 300 K for (a)  $\text{CaF}_2$ , (c)  $\text{SrF}_2$  and (e)  $\text{BaF}_2$ . Decomposed 4ph scattering phase spaces into the splitting ( $\lambda \rightarrow \lambda' + \lambda'' + \lambda'''$ ), redistribution ( $\lambda + \lambda' \rightarrow \lambda'' + \lambda'''$ ) and recombination ( $\lambda + \lambda' + \lambda'' \rightarrow \lambda'''$ ) processes at 300 K for (b)  $\text{CaF}_2$ , (d)  $\text{SrF}_2$  and (f)  $\text{BaF}_2$ . All of the above results were obtained using SCP method.

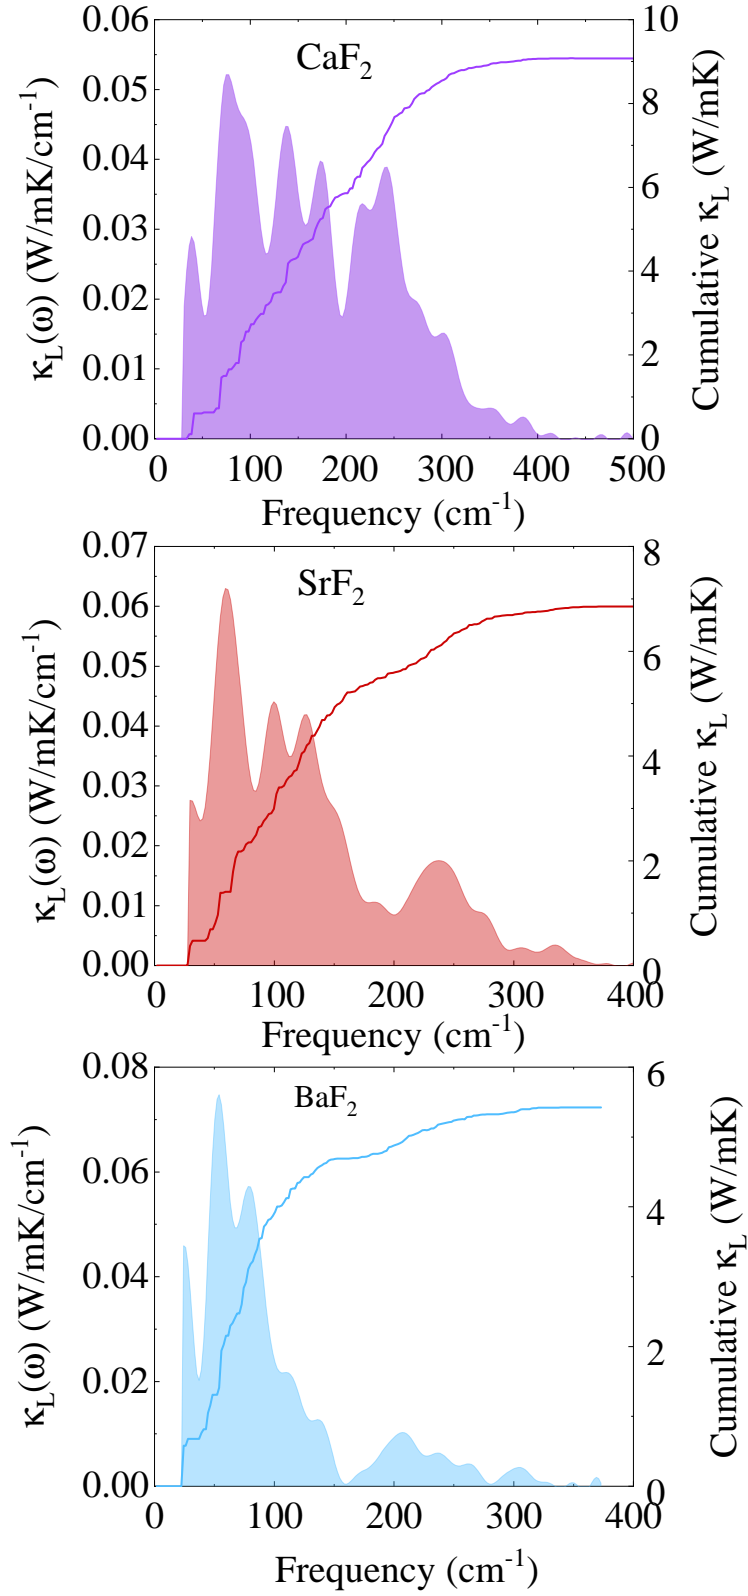

**Fig. S4.** (Color online). Lattice thermal conductivity spectrums  $\kappa_L(\omega)$  (the filled section below the curves) and relevant cumulative  $\kappa_L$  at 300 K for AF<sub>2</sub> (A = Ca, Sr, Ba).

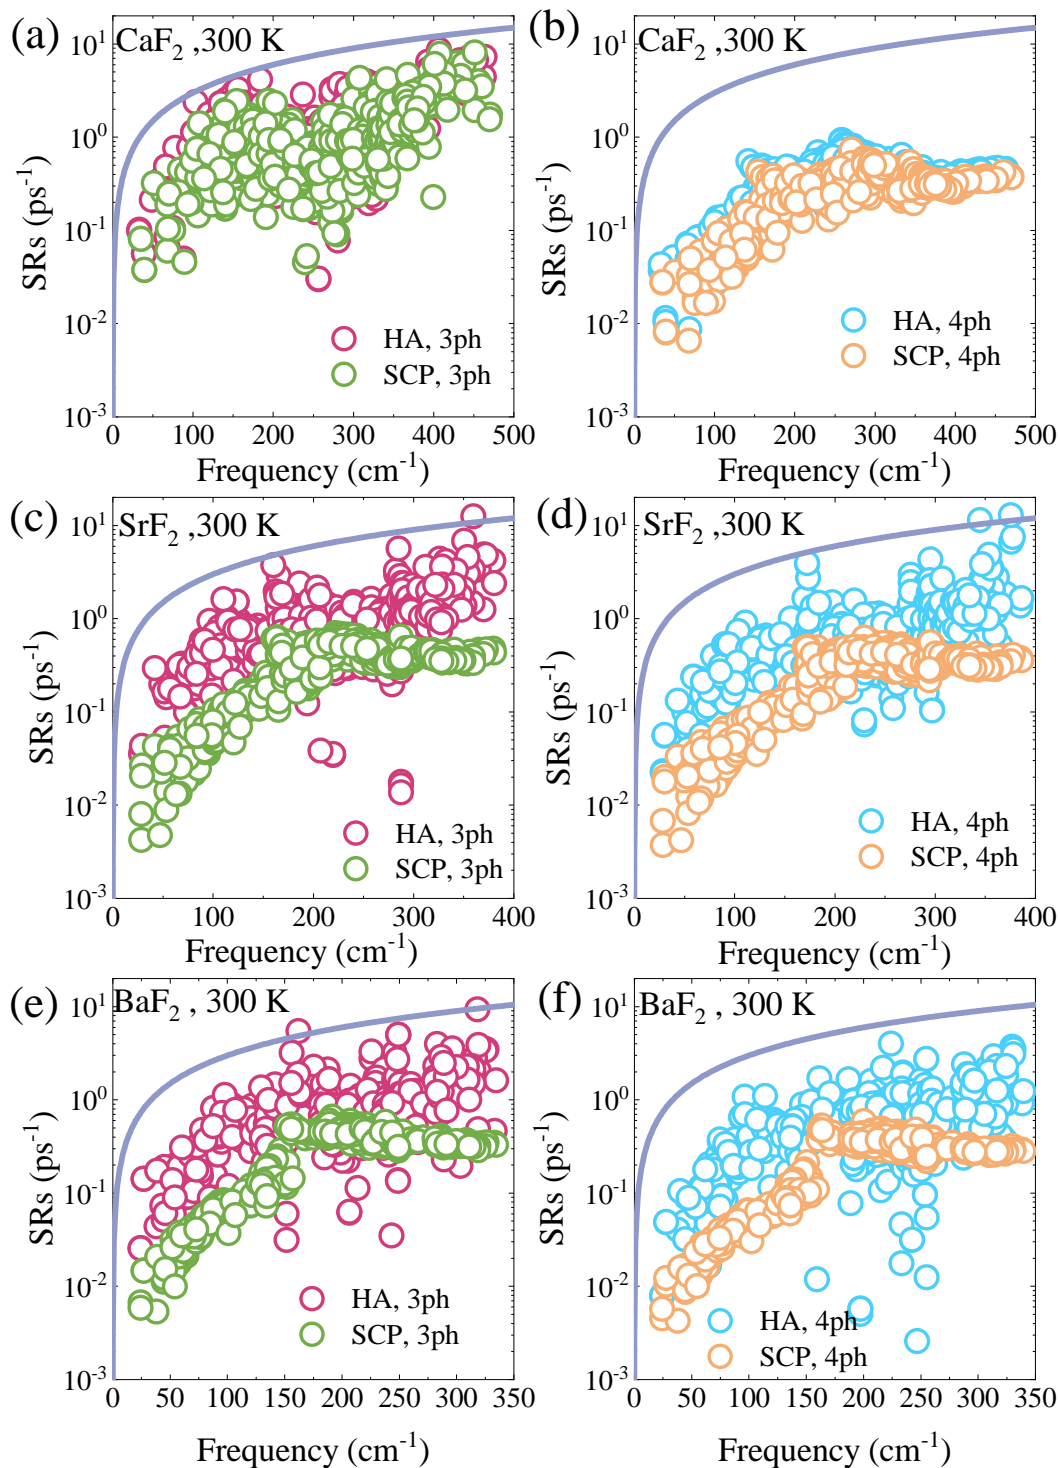

**Fig. S5.** (Color online). The calculated 3ph SRs and 4ph SRs for AF<sub>2</sub> (A = Ca, Sr, Ba) computed in HA approximations and SCP approximations.

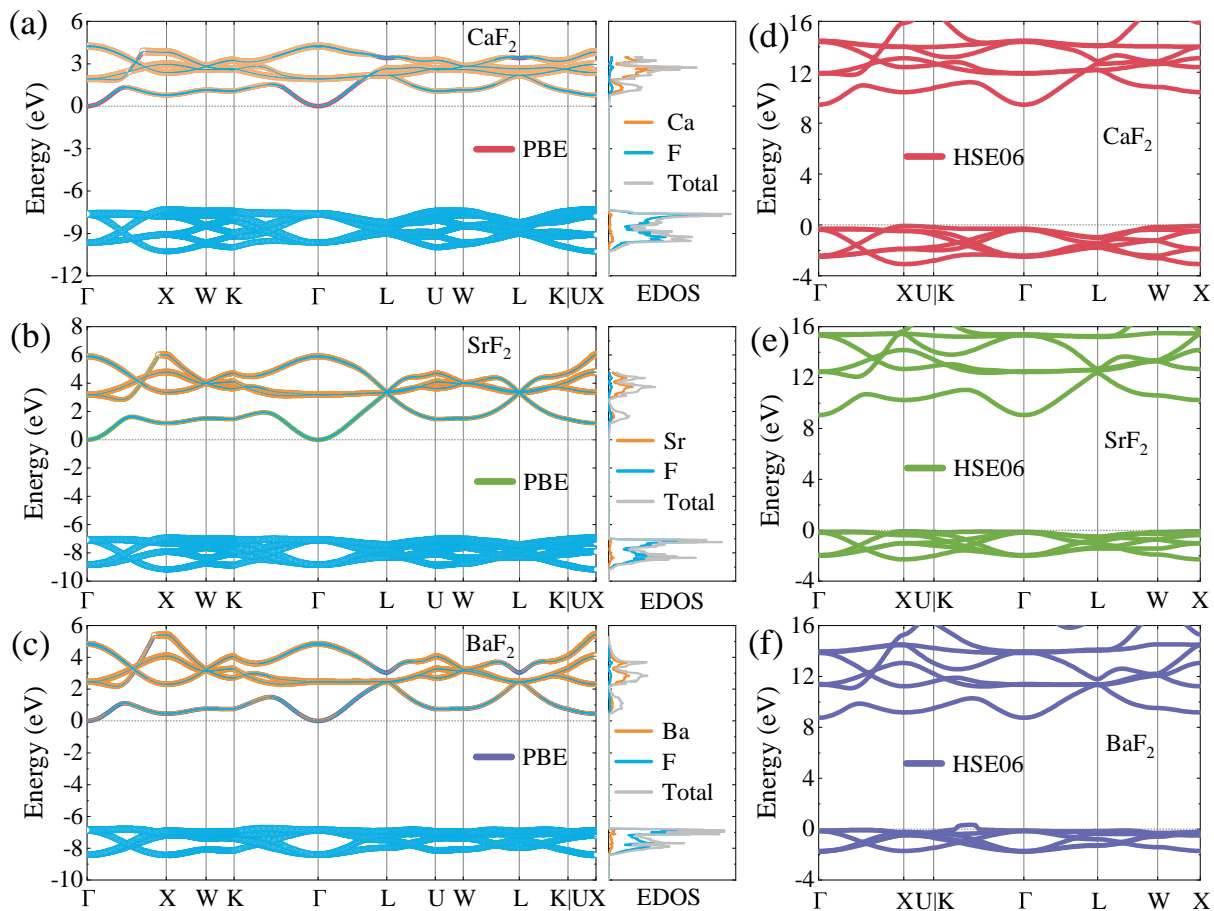

**Fig. S6.** (Color online). (a)-(c) The band structure of AF<sub>2</sub> (A = Ca, Sr, Ba) and the corresponding density of electronic states (EDOS) are calculated by using PBE functional. (d)-(f) The band structure calculated by HSE06 functional.

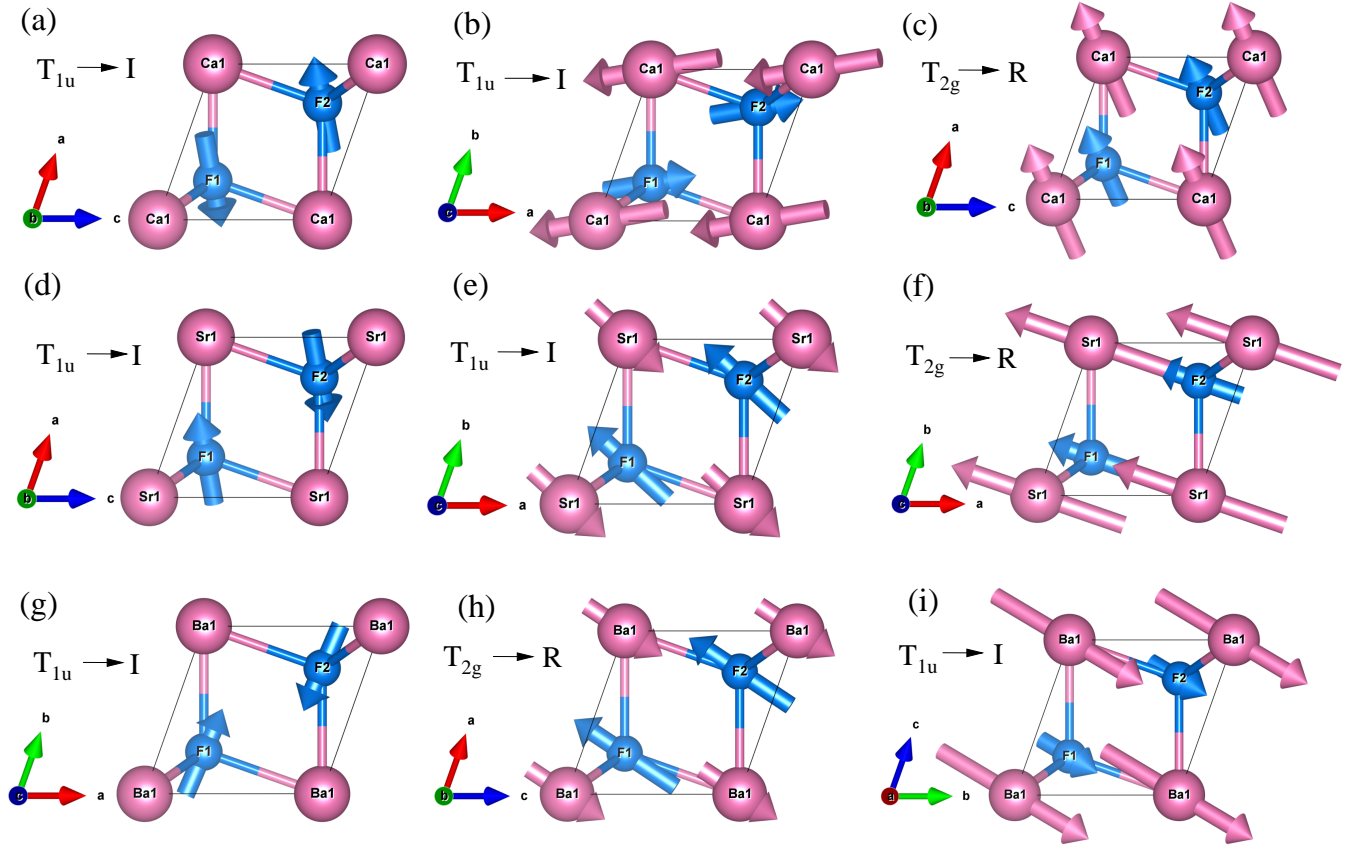

**Fig. S7.** (Color online). (a)-(i) are the vibration modes of the 1st phonon branch, the 4th phonon branch and the 7th phonon branch of each atom for  $AF_2$  ( $A = Ca, Sr, Ba$ ) at the  $\Gamma$  point and the Raman modes of the phonon branch.

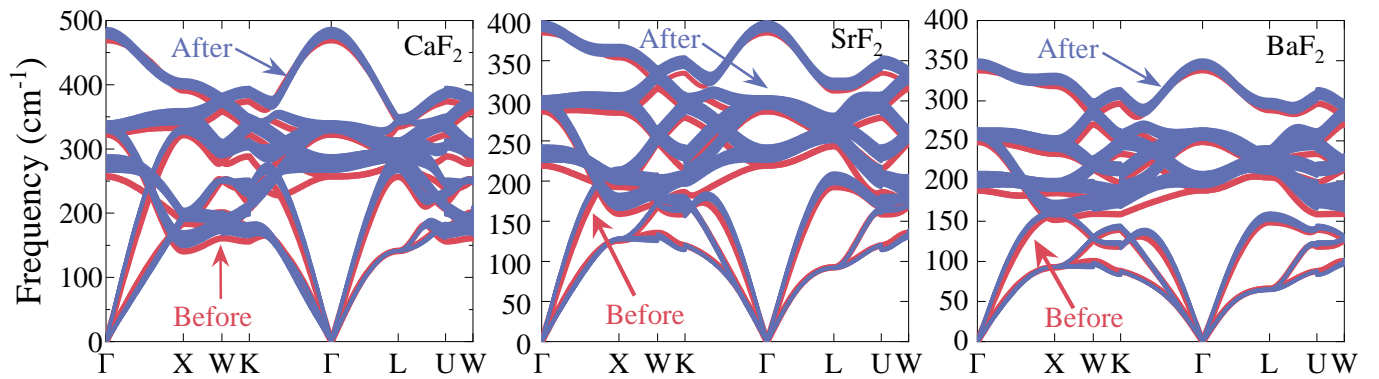

**Fig. S8.** (Color online). The phonon spectrum of  $AF_2$  ( $A = Ca, Sr, Ba$ ) before and after anharmonic correction.



---

\* y.zhao@ytu.edu.cn

† zhdai@ytu.edu.cn
